# Supplementary material for: Tissue mechanics controls T-cell activation and metabolism
Source: bioRxiv or medRxiv preprint supplement (doi:10.1101/581322), 2019-03-18

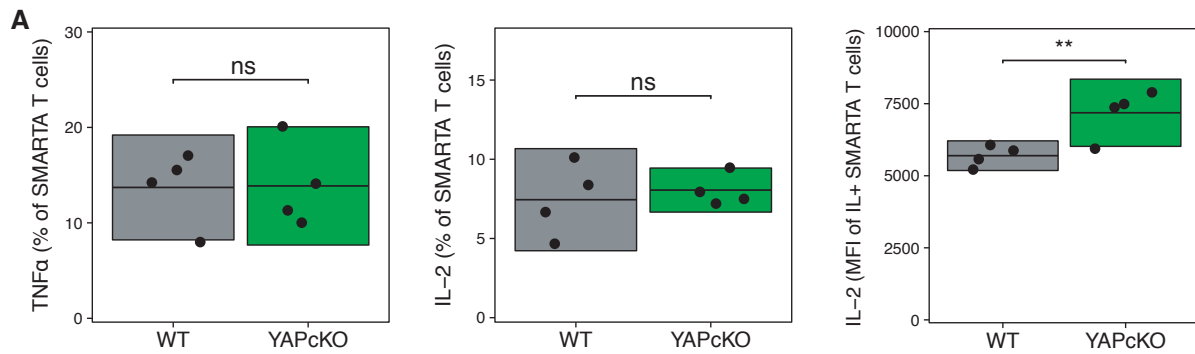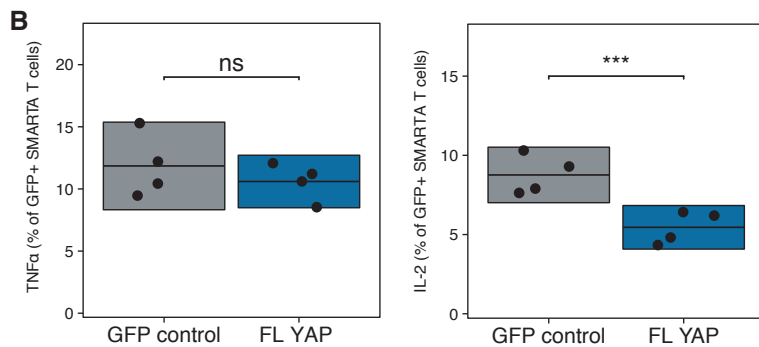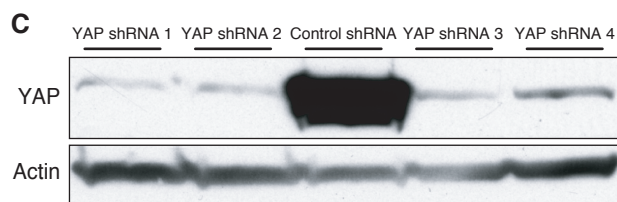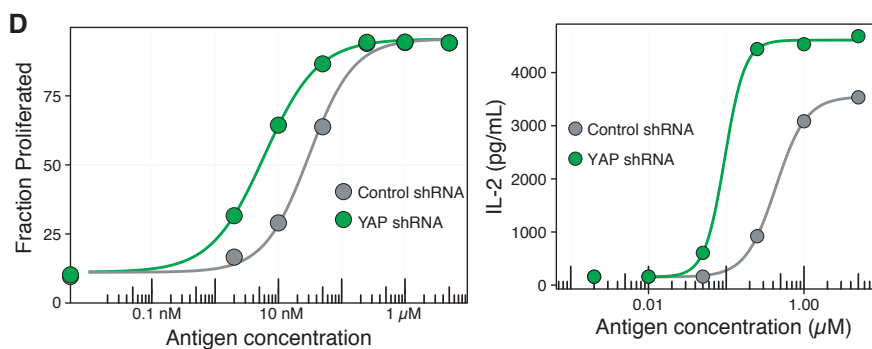

Supplement: Supplementary file [file media-3.pdf]
