# Supplementary material for: Tissue mechanics controls T-cell activation and metabolism
Source: bioRxiv or medRxiv preprint supplement (doi:10.1101/581322), 2019-03-18

**A Intracellular amino acids**

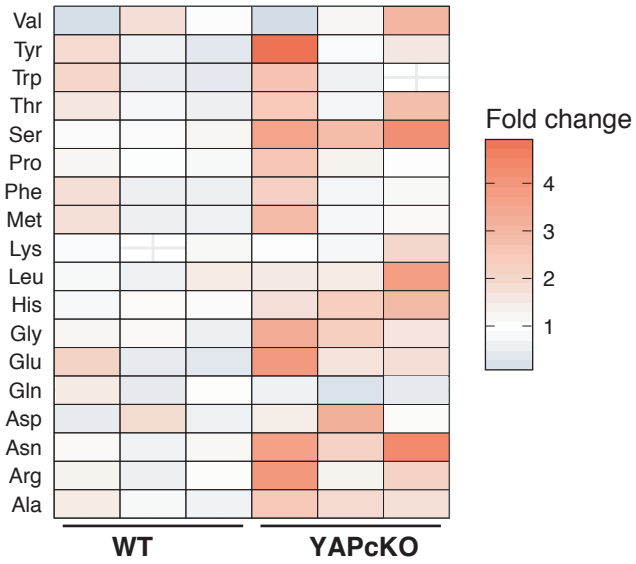

**B Extracellular amino acids**

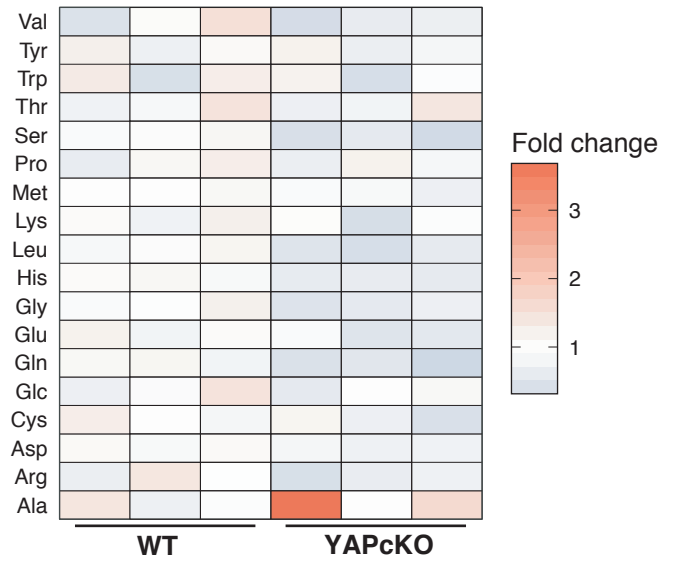

**C Gly**

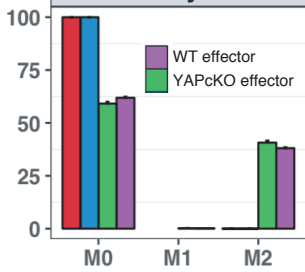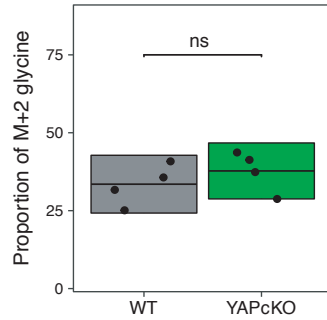

**D**

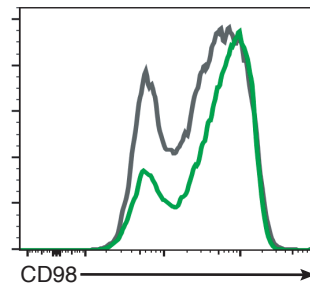

**Ser**

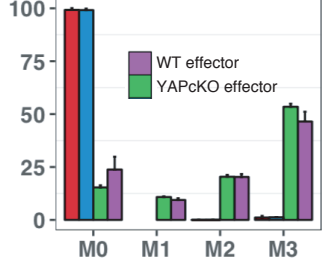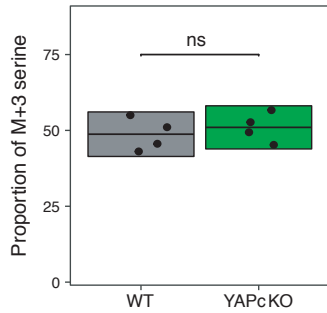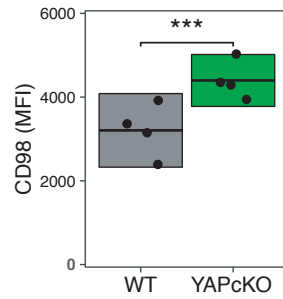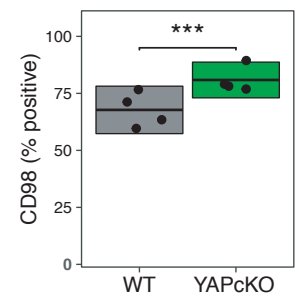

Supplement: Supplementary file [file media-5.pdf]
